# Supplementary material for: First evaluation of multifunctional poly(ionic liquid)s as novel strong bases in directional efficient valorization of lignin
Source: Royal Society of Chemistry journal article supplement (doi:10.1039/d2se00534d), 2022-01-01
Supplement: d2se00534d1.pdf [file d2se00534d1.pdf]

# Supporting Information

## 1 2 **First evaluation of multifunctional poly(ionic liquid)s as novel strong bases in** 3 **directional efficient valorization of lignin**

4 Guoqiang Zhang, Zhongqiu Liu\*, Yinuo Li, Yuanyuan Yu, Yujing Liu, Anguo Ying\*

5 *Key Laboratory of Life-Organic Analysis of Shandong Province, School of Chemistry and Chemical*  
6 *Engineering, Qufu Normal University, Qufu 273165, Shandong, P.R. China*

7

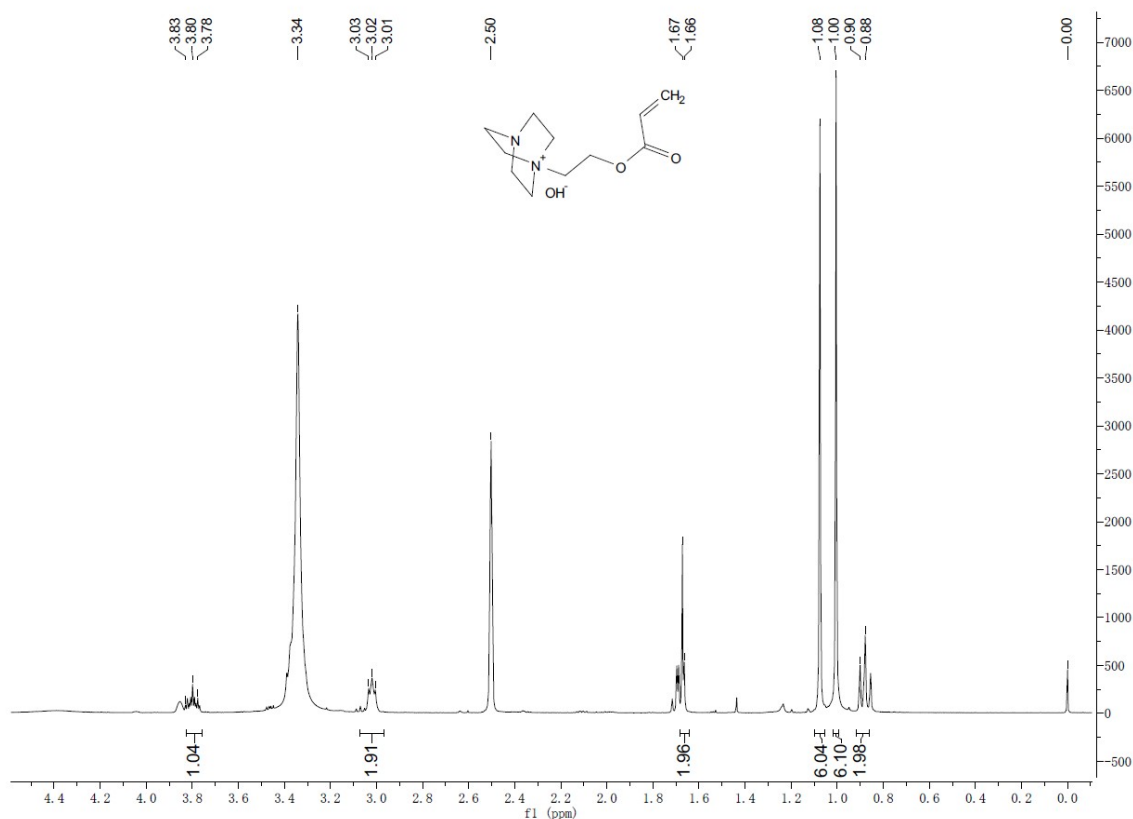

8  
9 **Fig. S1** 1-(2-(acryloyloxy)ethyl)-4-aza-1-azoniabicyclo[2.2.2]octane hydroxide. <sup>1</sup>H NMR (500 MHz,  
10 DMSO-d<sub>6</sub>) δ 3.80 (ddd, J = 11.3, 7.2, 4.1 Hz, 1H), 3.03 (m, 2H), 1.68 (m, 2H), 1.08 (s, 6H), 1.00 (s,  
11 6H), 0.88 (m, 2H).

\* Corresponding author. Tel: +86 537 4458301, Fax: +86 537 4458301.

E-mail address: liuzhongqiuzs@126.com (Z. Liu); yinganguo@163.com (A. Ying).

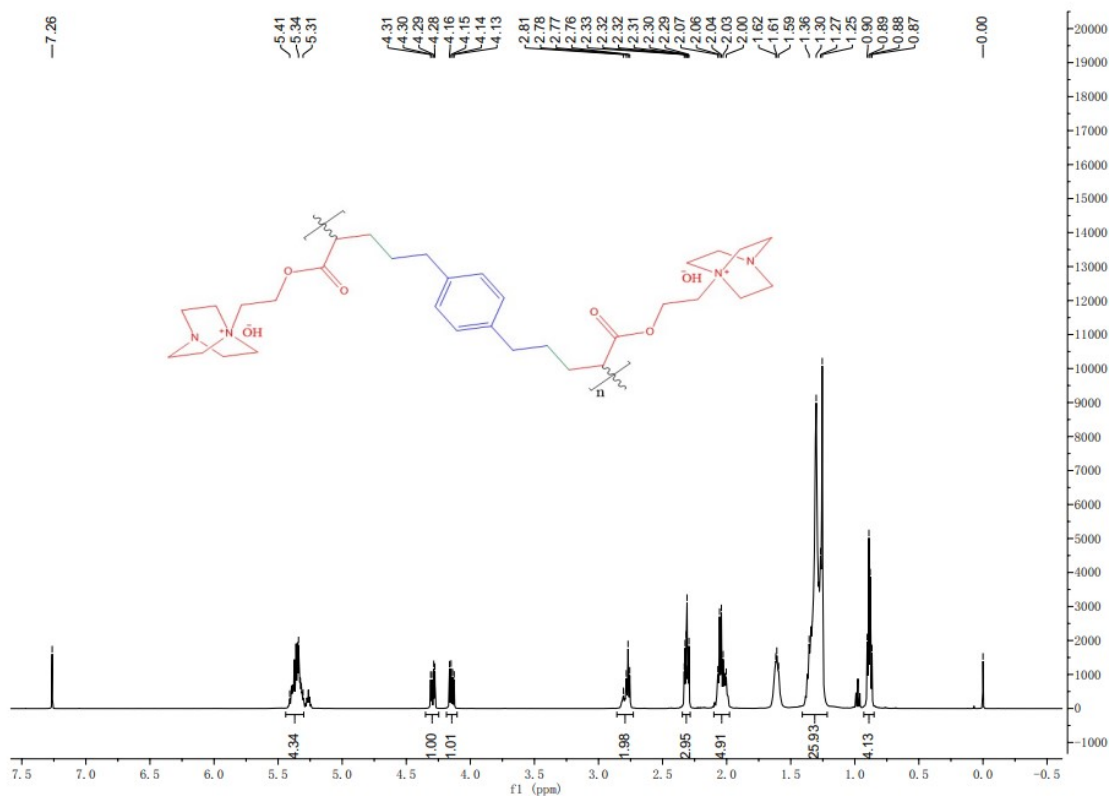

12

13 **Fig. S2** P(3DVB-[AD][OH]) in absence of Fe<sub>3</sub>O<sub>4</sub> nanoparticles. <sup>1</sup>H NMR (500 MHz, Chloroform-*d*) δ  
 14 5.44 – 5.30 (m, 4H), 4.14 (dd, *J* = 11.9, 6.0 Hz, 1H), 2.86 – 2.73 (m, 2H), 2.31 (td, *J* = 7.6, 3.3 Hz, 3H),  
 15 2.05 (h, *J* = 6.0, 5.4 Hz, 5H), 1.41 – 1.22 (m, 26H), 0.88 (td, *J* = 6.9, 4.7 Hz, 4H).

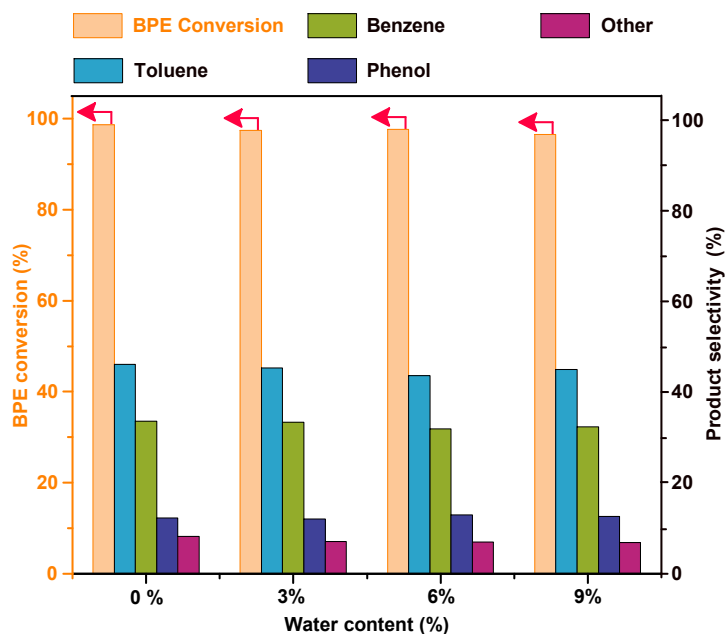

16

17 **Fig. S3** BPE conversion and product selectivity in mixed solvents of *h*-hexane and H<sub>2</sub>O. Reaction  
 18 conditions: 1.0 mmol BPE, 0.10 g P(3DVB-[AD][OH]), 300 °C, 8 h, and 20 mL solvent (*h*-  
 19 hexane:H<sub>2</sub>O=100:0, *h*-hexane:H<sub>2</sub>O=97:3, *h*-hexane:H<sub>2</sub>O=94:6 and *h*-hexane:H<sub>2</sub>O=91:9).

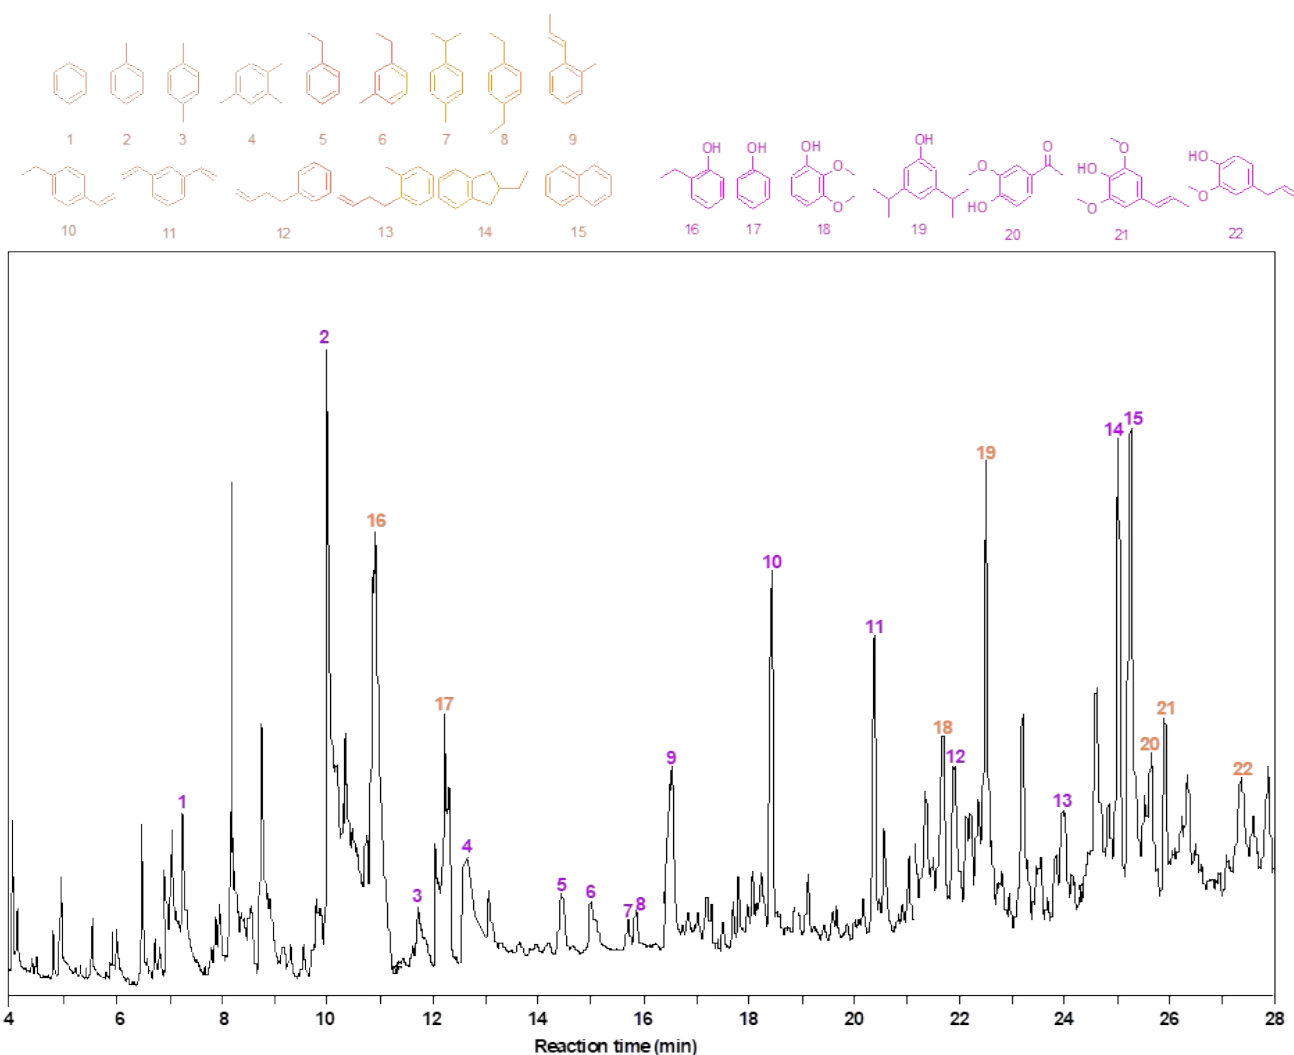

20  
 21 **Fig. S4** Total ion chromatogram of catalytic hydroconversion of lignin over P(3DVB-[AD][OH]).

22 To gain further insight into the outstanding catalytic properties of poly(ionic liquid)s, the XPS  
 23 characterization was conducted on fresh Kraft lignin and its depolymerized residue. According to **Fig.**  
 24 **S5**, there are mainly three types of carbon species existed in fresh Kraft lignin. The binding energy  
 25 located at 284.98 eV ( $C_{2a}$ ) can be attributed to C–OH and the binding energy located at 288.48 ( $C_4$ ) and  
 26 292.98 eV ( $C_5$ ) is generally in line with O=C–O and transitions in  $\pi$ -electrons of aromatic rings (shake  
 27 up-satellite), respectively.<sup>S1,S2</sup> Compared with the residue sample, the peak position of  $C_{2a}$ ,  $C_4$ , and  $C_5$   
 28 markedly shifts to a lower binding energy, which is ascribed to the directional cleavage of the C–O

29 bonds. In addition, the binding energy located at 285.78 eV ( $C_{2b}$ ) can be attributed to C–OR, suggesting  
30 MFPIs efficiently promote the cleavage of C–O bond to various MCACs. The ratio between  $C_4$  and  
31  $C_5$  in fresh Kraft lignin is remarkably higher than those in residue. The typical band of deformation  
32 vibrations of C–H bonds in syringyl rings and C–O stretch in alcohols /or ethers is near 1122 and 1196  
33  $\text{cm}^{-1}$  in IR spectrum, respectively, and these peaks ever existed in the lignin but diminished  
34 significantly in the solid residue after catalytic depolymerization. These results clearly illustrate that  
35 P(3DVB-[AD][OH]) plays a very significant role in the catalytic cleavage of C–O bridged bonds  
36 connecting some arene rings in lignin.

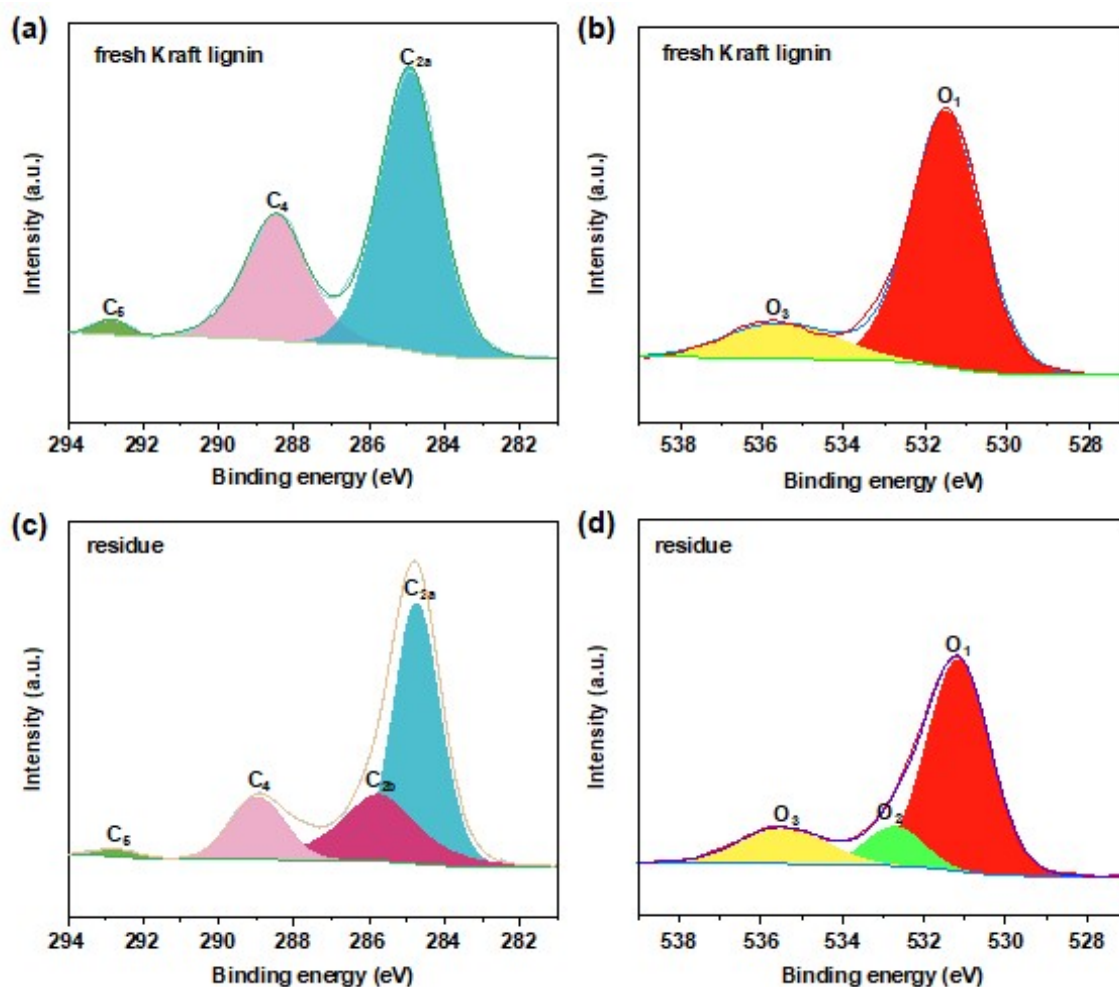

37  
38

Fig. S5. XPS spectra of fresh Kraft lignin and residue.

39 Subsequently, the lignin O1s spectrum was studied in **Fig. S5**, it was discovered that there were three  
40 kinds of oxygen signal peaks appeared in the residue. The peak located at 532.68 eV ( $O_2$ ) can be  
41 attributed to C–OH, C=O, and O–C=O and the peak observed at 531.48 ( $O_1$ ) can be assigned to benzyl  
42 aryl ether and diary ether. In addition, the peak located at 535.98 eV ( $O_3$ ) can be assigned to phenolic-  
43 OH, aliphatic aromatic ether, and acids.<sup>S3</sup> Compare with fresh Kraft lignin, the ratio of  $O_1$  and  $O_3$  in  
44 residue becomes weaker. Also, the signal peak of O1s shifts to a lower binding energy, indicating that  
45 MFPIs efficiently facilitate the cleavage of aromatic ether in lignin. These evidences further  
46 demonstrate that MFPIs have a significant influence on C–O band dissociation in lignin.

47 As shown in **Fig. S6**, all the peaks appearing in the fresh Kraft lignin sample are also retained in the  
48 residue but their intensity changed, indicating that the overall structure of lignin (and substituents) is  
49 changed after depolymerization. The peak in 14.4 ppm is typically assigned to  $\gamma$ -CH<sub>3</sub> in n-propyl side  
50 chain. The observance of peaks in range of 27–30 ppm is assigned to –CH<sub>2</sub>– in aliphatic side chain and  
51 30-36.8 is corresponded to –CH<sub>3</sub> group in aliphatic chain, and their intensities are elevated in residue in  
52 comparison to fresh Kraft lignin, which may be a result of lignin degradation or cleavage of the side  
53 chains in fresh Kraft lignin during the catalytic reaction. At the same time, it is also seen that there is  
54 peak at 55.6 ppm assigned to –OCH<sub>3</sub>, where is decreased in compared with the fresh one. In the case of  
55 residue, the appearance of peak at 60.2 ppm assigned to C- $\gamma$  in G type  $\beta$ -O-4 units is decreased.  
56 Following, the peaks at 100–115, 115–140, and 145-150 ppm belonged to the aromatic regions of  
57 lignin are reduced. Of these the peaks at 100–115 and 115–140 ppm is assigned to the C2, C5 of G, C2,  
58 C6 of S units and etherified C-1 of G and S units, C-3/C-5 in *p*-hydroxyphenyl, C-6 in G units. Thus,

59 the peak at 145 ppm belongs to non-etherified C-4 in G units.<sup>S6</sup> Lastly, the signals near 170 ppm are  
60 mostly associated with carboxyl and a distinct signal at 178 ppm is mostly due to carbonyl.<sup>S7</sup>  
61 Interestingly, it can be seen that the peak intensity in residue is moderately decreased, implying that  
62 during depolymerization of lignin these bonds are broken, followed by giving the desired products.

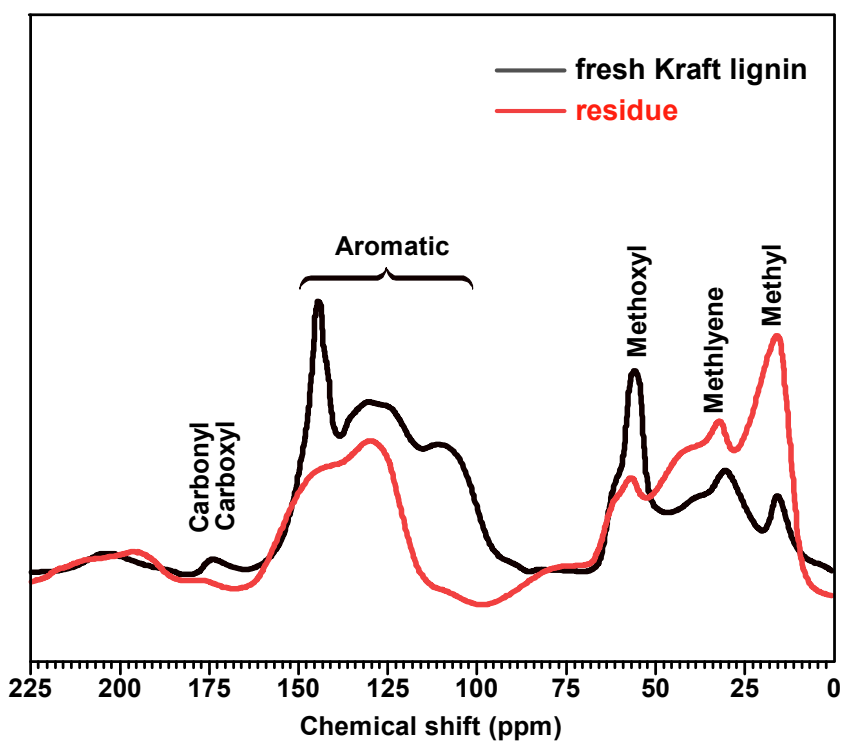

63  
64 **Fig. S6.** Solid-state <sup>13</sup>C NMR spectrum of fresh Kraft lignin and its catalytic residue.

65 To further investigate the effects of the MFPIs catalysts on the change of chemical and structural  
66 transformations in these samples during the catalytic depolymerization, <sup>31</sup>P NMR characterization  
67 technique was conducted on the phosphorylated fresh Kraft lignin and its catalytic residue. The  
68 information of substructures could be obtained by assigning the signals according to the previous  
69 publications.<sup>S8</sup> As shown in **Fig. S7**, the peak intensity of aliphatic OHs decreased significantly from  
70 fresh Kraft to residue sample, suggesting that there is remarkably side chain hydroxyl group left in the  
71 catalytic depolymerization process. More importantly, the peak intensity of S-type phenolic OH groups  
S6 / S10

72 were greatly decreased, while peak of G-and *p*-hydroxyphenyl OH were obviously increased,  
 73 indicating the S-type units were more susceptible to demethoxylation than G-type units. In addition, the  
 74 content of carboxylic groups in residue sample is decreased compared with the fresh Kraft lignin,  
 75 which is probably attributable to the cleavage of lignin. This is in good agreement with the results of  
 76 solid-state  $^{13}\text{C}$ -NMR.

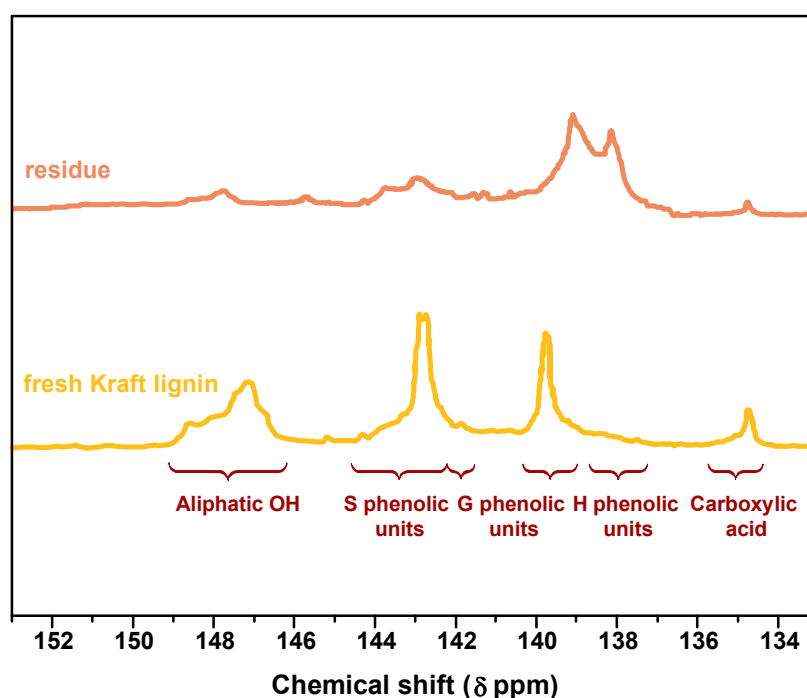

77  
 78 **Fig. S7.**  $^{31}\text{P}$  NMR spectra of fresh Kraft lignin and its catalytic residue after phosphitylation.

79 **Table S1** The molar ratio of starting materials in the preparation process of MFPIs.

| Entry          | The molar ratio of DVB/[AD][OH] | DVB (mmol) | [AD][OH] (mmol) | vinyl-modified $\text{Fe}_3\text{O}_4$ nanoparticles (mg) |
|----------------|---------------------------------|------------|-----------------|-----------------------------------------------------------|
| 1              | 0.5:1                           | 0.5 mmol   | 1 mmol          | 200 mg                                                    |
| 2              | 1:1                             | 1 mmol     | 1 mmol          | 200 mg                                                    |
| 3              | 2:1                             | 2 mmol     | 1 mmol          | 200 mg                                                    |
| 4              | 3:1                             | 3 mmol     | 1 mmol          | 200 mg                                                    |
| 5              | 4:1                             | 4 mmol     | 1 mmol          | 200 mg                                                    |
| 6              | 5:1                             | 5 mmol     | 1 mmol          | 200 mg                                                    |
| 7 <sup>a</sup> | 4:1                             | 4 mmol     | 1 mmol          | 0 mg                                                      |

80 <sup>a</sup>: P(3DVB-[AD][OH]) in absence of  $\text{Fe}_3\text{O}_4$  nanoparticles.

81 **Table S2** Comparison of the depolymerization reaction of lignin in different catalyst system.

| Entry | Feedstock         | Catalyst                                        | Reaction condition         | Monomer yield (wt.%) | Ref. |
|-------|-------------------|-------------------------------------------------|----------------------------|----------------------|------|
| 1     | Organosolv lignin | NaOH                                            | 300 °C, 90 MPa IHP, 40 min | 15.79                | 1    |
| 2     | Organocell lignin | Fe <sub>2</sub> O <sub>3</sub>                  | 380 °C, 10 MPa IHP, 67 min | <17.00               | 2    |
| 3     | Hydrolysis lignin | NiMoP/ $\gamma$ -Al <sub>2</sub> O <sub>3</sub> | 380 °C, 7 MPa IHP, 60 min  | <10.00               | 3    |
| 4     | Maf lignin        | NiMo                                            | 400 °C, 10 MPa IHP, 20 min | 3.80                 | 4    |
| 5     | Organosolv lignin | Ni/Si-Al <sub>2</sub> O <sub>3</sub>            | 390 °C, 1 MPa IHP, 30 min  | 5.00                 | 5    |
| 6     | Kraft lignin      | Mo <sub>2</sub> C/CNF                           | 300 °C, 5 MPa IHP, 4 h     | 6.00                 | 6    |

82

83

84 **Table S3** The distributions of arenes.

| arenes                                        | yield (wt.%) |
|-----------------------------------------------|--------------|
| benzene                                       | 0.64         |
| toluene                                       | 4.62         |
| <i>p</i> -xylene                              | 1.49         |
| 1,2,4-trimethylbenzene                        | 1.13         |
| ethylbenzene                                  | 0.48         |
| 1-ethyl-3-methylbenzene                       | 0.59         |
| <i>p</i> -cymene                              | 0.38         |
| 1,4-diethylbenzene                            | 0.29         |
| ( <i>E</i> )-1-methyl-2-(prop-1-en-yl)benzene | 1.40         |
| 1-ethyl-4-vinylbenzene                        | 1.36         |
| 1,3-divinylbenzene                            | 0.89         |
| but-3-en-1-ylbenzene                          | 0.33         |
| 1-(but-3-en-1-yl)-2-methylbenzene             | 0.30         |
| 2-ethyl-2,3-dihydro-1 <i>H</i> -indene        | 0.43         |
| naphthalene                                   | 0.56         |
| other arenes                                  | 0.50         |
| total                                         | 15.39        |

85



86 **Table S4** The distributions of arenols.

| arenols                                             | yield (wt.%) |
|-----------------------------------------------------|--------------|
| phenol                                              | 1.24         |
| 2-ethylphenol                                       | 3.16         |
| 2,3-dimethoxyphenol                                 | 0.36         |
| 3,5-diisopropylphenol                               | 0.53         |
| 1-(4-hydroxy-3-methoxyphenyl)ethan-1-one            | 0.27         |
| ( <i>E</i> )-2,6-dimethoxy-4-(prop-1-en-1-yl)phenol | 0.18         |
| 4-allyl-2-methoxyphenol                             | 0.62         |
| other arenols                                       | 0.24         |
| total                                               | 6.60         |

87

88

89 **Table S5** The distributions of other products

| other products | yield (wt.%) |
|----------------|--------------|
| aldehydes      | 4.37         |
| esters         | 3.41         |
| alcohols       | 4.43         |
| other          | 7.04         |
| total          | 19.25        |

90 (**Table S3-S5**) Yields of GC-MS detectable SPs obtained by catalytic hydrogenolysis of lignin using  
 91 P(3DVB-[AD][OH]). Reaction conditions: catalyst 0.1 g, lignin 0.1 g, *n*-hexane 20 mL, 300 °C, 5 MPa  
 92 IHP, for 8 h.

93

94

95 **Table S6** The lignin conversion and yields of SPs over P(3DVB-[AD][OH])<sup>a</sup> and P(3DVB-[AD][OH])

| catalysts                     | lignin conversion (%) | yield (wt.%) |         |           |        |          |       |
|-------------------------------|-----------------------|--------------|---------|-----------|--------|----------|-------|
|                               |                       | arenes       | arenols | aldehydes | esters | alcohols | other |
| P(3DVB-[AD][OH]) <sup>a</sup> | 24.68                 | 6.18         | 2.46    | 2.69      | 2.70   | 2.95     | 7.70  |
| P(3DVB-[AD][OH])              | 41.24                 | 15.39        | 6.60    | 4.37      | 3.41   | 4.43     | 7.04  |

96 Reaction conditions: catalyst 0.1 g, lignin 0.1 g, *n*-hexane 20 mL, 300 °C, 5 MPa IHP, and 8 h.

97 <sup>a</sup>: P(3DVB-[AD][OH]) in absence of Fe<sub>3</sub>O<sub>4</sub>.

98

99

100 **Table S7** The XPS results for fresh Kraft lignin and residue.

| Peaks           | Sample                  | Fresh Kraft lignin | Residue |
|-----------------|-------------------------|--------------------|---------|
| C <sub>1s</sub> | C <sub>2a</sub> (eV)    | 284.98             | 284.78  |
|                 | C <sub>2a</sub> (area%) | 66.9               | 57.34   |
|                 | C <sub>2b</sub> (eV)    | -                  | 285.78  |
|                 | C <sub>2b</sub> (area%) | -                  | 25.94   |
|                 | C <sub>4</sub> (eV)     | 288.48             | 288.98  |
|                 | C <sub>4</sub> (area%)  | 32.0               | 15.2    |
|                 | C <sub>5</sub> (eV)     | 292.98             | 292.78  |
|                 | C <sub>5</sub> (area%)  | 11.1               | 1.52    |
| O <sub>1s</sub> | O <sub>1</sub> (eV)     | 531.48             | 531.28  |
|                 | O <sub>1</sub> (area%)  | 82.5               | 71.1    |
|                 | O <sub>2</sub> (eV)     | -                  | 532.68  |
|                 | O <sub>2</sub> (area%)  | -                  | 12.0    |
|                 | O <sub>3</sub> (eV)     | 535.58             | 535.98  |
|                 | O <sub>3</sub> (area%)  | 17.5               | 16.9    |

101 **References:**

- 102 S1 J. Laine, P. Stenius, G. Carlsson and G. Ström, *Cellulose*, 1994, **1**, 145-160.
- 103 S2 J. B. Guo, Z. Y. Tao and X. G. Luo, *Acta Chimica Sinica*, 2005, **63**, 1536-1540.
- 104 S3 A. Ahmed, A. Adnot and S. Kaliaguine, *J. App. Polym. Sci.*, 1987, **34**, 359-375.
- 105 S4 S. N. Sun, M. F. Li, T. Q. Yuan, F. Xu and R. C. Sun, *Ind. Crop. Prod.*, 2012, **37**, 51-60.
- 106 S5 M. S. Jahan, D. A. N. Chowdhury, M. K. Islam and S. M. I. Moeiz, *Bioresource Technol.*, 2007, **98**,  
107 465-469.
- 108 S6 J. L. Wen, S. L. Sun, B. L. Xue, and R. C. Sun, *Materials*, 2013, **6**, 359-391.
- 109 S7 D. F. Cipriano, L. S. Chinelatto Jr, S. A. Nascimento, C. A. Rezende, S. M. C. de Menezes  
110 And J. C. C. Freitas, *Biomass & Bioenergy*, 2020, **142**, 105792.
- 111 S8 T. Parsell, S. Yohe, J. Degenstein, T. Jarrell, I. Klein, E. Gencer, B. Hewetson, M. Hurt, J.I. Kim, H.  
112 Choudhari, B. Saha, R. Meilan, N. Mosier, F. Ribeiro, W.N. Delgass, C. Chapple, H.I. Kenttamaa, R.  
113 Agrawal and M.M. Abu-Omar, *Green Chem.*, 2015, **17**, 1492-1499.
